# Supplementary material for: Variability in the Munc13-1 content of excitatory release sites
Source: eLife. 2021 Apr 27;10:e67468. doi: 10.7554/eLife.67468 (PMC8116053; doi:10.7554/eLife.67468)
Supplement: Figure 1—source data 1. [file elife-67468-fig1-data1.xlsx]

## Sheet: Fig 1
Fig.1 panels D-E				Fig.1 panel G			Fig.1 panel H
RT seleceted 2 mM Ca2+	Peak amplitude (pA)	P2/P1		kr20190219-02			kr20190219-02
mean	113.061	0.848373		sweep number	amplitude (pA)			mean (pA)	variance
sd	110.954	0.318555		1	178.199		P1	167.54	1740.45
CV	0.981362	0.37549		2	146.66		P2	95.5519	1912.51
min	3.42625	0.289352		3	149.053		P3	68.7889	1069.13
max	507.383	1.84749		4	142.232		P4	41.2912	1630.92
n	68	68		5	297.064		P5	38.0028	1473.53
				6	189.189		P6	37.5683	846.387
kr20190327-02	61.617	0.97		7	208.884		P7	86.2025	1886.42
kr20190426-03	47.931	0.29		8	210.408
kr20190528-01	143.403	0.68		9	179.404
kr20190529-02	45.9419	0.599437		10	182.654
kr20190529-06	47.2247	0.419125		11	211.435
kr20190604-11	47.8525	0.7619		12	144.284
kr20190605-02	39.5616	0.848459		13	111.649
kr20190606-02	185.151	0.289352		14	117.743
kr20190607-02	98.6547	0.729049		15	148.257
kr20190611-08	48.44	0.743839		16	128.813
kr20190612-02	418.111	0.68943		17	136.763
kr20190612-07	109.881	0.762076		18	161.821
kr20190620-06	323.812	0.661448		19	202.258
kr20190620-11	189.924	0.676762		20	211.009
kr20190621-03	22.9621	0.615229		21	165.596
kr20190621-11	51.9034	0.988195		22	113.97
kr20190624-01	132.731	0.655214		23	188.59
kr20190624-05	39.9153	1.11975		24	122.78
kr20190625-07	507.383	0.649352		25	145.094
kr20190626-01	226.903	0.900657		26	217.094
kr20190626-06	66.5767	0.785557		27	153.671
kr20190627-08	71.9087	1.20515		28	186.339
kr20190709-01	35.7588	0.688365		29	107.756
kr20190710-02	125.338	0.686013
kr20190710-15	79.2189	1.36965
kr20190711-13	14.5932	1.22561
kr20190716-02	7.35106	1.8194
kr20190716-07	12.1198	0.58805
kr20190717-01	272.555	0.610393
kr20190717-06	60.9739	0.7126
kr20190717-14	18.0782	1.02556
kr20190717-19	31.4621	0.845982
kr20190718-02	22.7914	0.442153
kr20190719-08	60.07	0.66
kr20190924-04	155.659	0.85
kr20190924-08	87.0183	0.58956
kr20190925-01	135.733	0.70858
kr20190926-11	273.449	0.663049
kr20191001-01	53.7	1.14955
kr20191001-06	311.465	1.02283
kr20191003-06	63.2919	0.752774
kr20191004-02	211.163	0.683473
kr20191004-07	35.9976	1.06983
kr20191008-02	71.1038	0.83224
kr20191009-01	61.7795	1.01457
kr20191017-06 PC1	192.538	0.866158
kr20191017-06 PC2	309.896	0.719931
kr20191113-07 PC1	76.5206	1.25907
kr20191113-07 PC2	52.3716	0.781346
kr20191114-06 PC1	7.29837	1.49947
kr20191114-06 PC2	98.0766	0.503438
kr20191204-06 PC1	88.3722	0.6978
kr20191204-06 PC2	71.2123	0.84558
kr20191205-02 PC1	477.933	0.740883
kr20191206-03 PC1	63.1457	0.925091
kr20191206-03 PC2	139.499	0.615884
kr20191207-04 PC1	32.1095	0.474575
kr20191207-04 PC2	70.9492	1.15098
kr20191210-02 PC1	150.891	1.26729
kr20191217-04 PC1	82.747	0.957974
kr20191217-04 PC2	3.42625	1.84749
kr20200116-02 PC1	17.5737	0.768333
kr20200116-02 PC2	7.8889	1.63301
kr20200123-06 PC1	12.1119	1.36297
kr20200123-06 PC2	190.441	0.721159
kr20200622-02	140.676	0.576882
kr20200623-11	197.616	0.720832
kr20200703-01	76.4082	0.702989
