# Supplementary material for: Variability in the Munc13-1 content of excitatory release sites
Source: eLife. 2021 Apr 27;10:e67468. doi: 10.7554/eLife.67468 (PMC8116053; doi:10.7554/eLife.67468)
Supplement: Figure 2—figure supplement 1—source data 1. [file elife-67468-fig2-figsupp1-data1.xlsx]

## Sheet: Fig2 S1
Fig.2 S1 panels A-E
	Peak amplitude (pA)		Pv		q (pA)	N
	2 mM [Ca2+]	6 mM [Ca2+]	2 mM [Ca2+]	6 mM [Ca2+]
mean	107.046	170.125	0.420043	0.707483	27.3848	10
sd	90.5686	112.629	0.149202	0.101515	14.1056	8.20881
CV	0.846073	0.662036	0.355205	0.143487	0.51509	0.820881
min	12.1198	38.5333	0.194474	0.535423	11.7	2
max	323.812	380.211	0.714722	0.856185	63.3	33
n	14	14	14	14	14	14
kr20190620-06	323.812	380.211	0.714722	0.84	27.009	17
kr20190620-11	189.924	300.26	0.436736	0.690458	63.3	7
kr20190621-11	51.9034	93.06	0.363622	0.65	11.7	12
kr20190709-01	35.7588	70.7202	0.346406	0.685087	28.46	4
kr20190710-02	125.338	216.506	0.495657	0.856185	19.8	13
kr20190716-07	12.1198	38.5333	0.194474	0.618304	30.7	2
kr20190719-08	60.0714	132.632	0.296039	0.65364	27.17	7
kr20190924-08	87.0183	205.765	0.263227	0.622432	52.2	6
kr20191003-06	63.2919	82.147	0.611314	0.793429	24.948	4
kr20191004-02	211.163	318.271	0.554195	0.835299	21.909	17
kr20191004-07	35.9976	52.2671	0.548625	0.796582	20.963	3
kr20191008-02	71.1038	157.021	0.327562	0.723368	23.068	9
kr20191205-02 PC2	33.5247	62.0438	0.28931	0.535423	18.69	6
kr20200623-11	197.616	272.312	0.438721	0.604552	13.47	33
