# Supplementary material for: Variability in the Munc13-1 content of excitatory release sites
Source: eLife. 2021 Apr 27;10:e67468. doi: 10.7554/eLife.67468 (PMC8116053; doi:10.7554/eLife.67468)
Supplement: Figure 2—source data 1. [file elife-67468-fig2-data1.xlsx]

## Sheet: Fig 2
Fig.2 panels A-G	Fig.2 panel A	Fig.2 panel B	Fig.2 panel C	Fig.2 panel D		Fig.2 panels H-J
name	Peak amplitude (pA)	N round	q	Pv		name	Peak amplitude (pA)	N / AZ	Contact number	Pv	q
mean	215.907	9.89362	32.4282	0.716627		mean	233.635	4.89533	2.34615	0.721636	35.1002
sd	211.227	8.99573	16.0303	0.101669		sd	206.249	3.65298	1.59856	0.105907	15.4444
CV	0.978327	0.909246	0.494334	0.141872		CV	0.882784	0.746218	0.681352	0.14676	0.440009
min	38.5333	2	11.7	0.505063		min	38.5333	1.2	1	0.541809	11.7
max	1031.48	45	90.31	0.982691		max	980.35	16.5	7	0.982691	70.61
n	47	47	47	47		n	26	26	26	26	26
kr20181110-02	124.009	6	23.949	0.83649		kr20181110-02	124.009	3	2	0.83649	23.949
kr20181129-14	38.8021	2	32.77	0.6199		kr20181129-14	38.8021	2	1	0.6199	32.77
kr20181130-02	171.939	4	62.03	0.695662		kr20181130-02	171.939	1.33333	3	0.695662	62.03
kr20181204-03	99.22	5	26.5	0.701135		kr20181205-08	980.35	6.42857	7	0.593466	36.85
kr20181205-08	980.35	45	36.85	0.593466		kr20190111-02	197.35	1.4	5	0.797606	35.91
kr20181212-06	137.98	7	29.13	0.696573		kr20190115-03	506.75	9	2	0.982691	29.4
kr20190111-02	197.35	7	35.91	0.797606		kr20190121-12	121.126	3	2	0.686969	30.4
kr20190115-03	506.75	18	29.4	0.982691		kr20190205-04	358.15	2.66667	3	0.82593	56.17
kr20190121-12	121.126	6	30.4	0.686969		kr20190207-07	578.03	8	2	0.637604	56.03
kr20190125-02	205.28	7	38.37	0.820554		kr20190219-02	167.54	3.5	2	0.700887	33.27
kr20190130-14	54.96	4	22.19	0.643033		kr20190222-03	279.08	2	5	0.825693	33.3
kr20190205-04	358.15	8	56.17	0.82593		kr20190620-09	380.211	8.5	2	0.84	27.009
kr20190207-03	39.9	2	39.5	0.505063		kr20190620-13	300.26	3.5	2	0.690458	63.3
kr20190207-07	578.03	16	56.03	0.637604		kr20190621-13	93.06	12	1	0.651955	11.7
kr20190219-02	167.54	7	33.27	0.700887		kr20190709-03	70.7202	4	1	0.685087	28.46
kr20190221-02	134.92	5	38.13	0.707684		kr20190716-11	38.5333	2	1	0.618304	30.7
kr20190222-03	279.08	10	33.3	0.825693		kr20190719-10	132.632	7	1	0.65364	27.17
kr20190226-03	56.89	6	19.776	0.52304		kr20190924-10	205.765	1.2	5	0.622432	52.2
kr20190312-02	483.67	22	30.65	0.733632		kr20191003-08	82.147	4	1	0.793429	24.948
kr20190326-06	88.2168	8	13.5	0.806738		kr20191004-04	318.271	4.25	4	0.835299	21.909
kr20190607-14	173.304	12	19.3	0.755211		kr20191207-06 PC1	56.6661	2	2	0.693228	21.74
kr20190612-14	94.4284	4	35.9	0.632288		kr20191217-06 PC1	85.2793	2	2	0.766801	31.24
kr20190620-09	380.211	17	27.009	0.84		kr20200123-09 PC2	229.543	6	1	0.541809	70.61
kr20190620-13	300.26	7	63.3	0.690458		kr20200622-05	155.887	6	1	0.694609	34.58
kr20190621-13	93.06	12	11.7	0.651955		kr20200623-15	272.312	16.5	2	0.604552	13.47
kr20190625-13	1031.48	38	36.48	0.749209		kr20200703-04	130.089	6	1	0.868035	23.49
kr20190709-03	70.7202	4	28.46	0.685087
kr20190710-05	216.506	13	19.8	0.856185
kr20190716-11	38.5333	2	30.7	0.618304
kr20190719-10	132.632	7	27.17	0.65364
kr20190924-10	205.765	6	52.2	0.622432
kr20191001-03	143.37	2	90.31	0.778202
kr20191003-08	82.147	4	24.948	0.793429
kr20191003-12	334.858	12	33.211	0.812469
kr20191004-04	318.271	17	21.909	0.835299
kr20191004-09	52.2671	3	20.963	0.796582
kr20191017-08 PC2	282.86	12	31.978	0.717393
kr20191113-09 PC2	96.7955	8	17.522	0.672047
kr20191205-05 PC2	62.0438	6	18.69	0.535423
kr20191206-06 PC1	103.023	11	12.935	0.702355
kr20191206-06 PC2	181.143	14	16.6841	0.774118
kr20191207-06 PC1	56.6661	4	21.74	0.693228
kr20191217-06 PC1	85.2793	4	31.24	0.766801
kr20200123-09 PC2	229.543	6	70.61	0.541809
kr20200622-05	155.887	6	34.58	0.694609
kr20200623-15	272.312	33	13.47	0.604552
kr20200703-04	130.089	6	23.49	0.868035
