# Supplementary material for: Variability in the Munc13-1 content of excitatory release sites
Source: eLife. 2021 Apr 27;10:e67468. doi: 10.7554/eLife.67468 (PMC8116053; doi:10.7554/eLife.67468)
Supplement: Figure 3—source data 1. [file elife-67468-fig3-data1.xlsx]

## Sheet: Fig 3
Fig.3 panel E				Fig.3J left panel	Contact number	Summed Munc13-1 intensity		Fig.3J middle panel	N / AZ	Normalized Munc13-1 intensity	Fig.3J right panel	Pv	Normalized Munc13-1 intensity
kr20190620-05				mean	1.63636	3.88814			3.77778	2.37639	mean	0.721647	2.37639
				sd	0.6742	1.45514			2.31505	0.803975	sd	0.0737165	0.803975
				CV	0.412011	0.374252			0.612809	0.338318	CV	0.10215	0.338318
				min	1	2.00374			1	0.748337	min	0.618304	0.748337
	mean (pA)	variance		max	3	6.7723			9	4.47832	max	0.838928	4.47832
				n	11	11			18	18	n	18	18
P1	155.887	1630.65		kr20181129-14	1	2.00374		kr20181129-14	2	2.00384	kr20181129-14	0.619934	2.00384
P2	74.8079	1733.98		kr20190716-11	1	2.88234		kr20190716-11	2	2.88234	kr20190716-11	0.618304	2.88234
P3	36.2729	1041.54		kr20190719-10	1	2.65901		kr20190719-10	7	2.65901	kr20190719-10	0.65364	2.65901
P4	31.0799	1089.54		kr20191003-08	1	3.26029		kr20191003-08	4	3.26029	kr20191003-08	0.793429	3.26029
P5	22.165	591.482		kr200622_C1	1	2.29881		KR200622_C1	6	2.3	KR200622_C1	0.694609	2.3
P6	18.4956	344.501		kr20190121-12	2	4.82322		kr20190121-12 contact1	3	2.34034	kr20190121-12 contact1	0.685786	2.34034
P7	81.875	1841.53		kr20190219-02	2	6.7723		kr20190121-12 contac t2	3	2.48288	kr20190121-12 contac t2	0.685786	2.48288
				kr20190620-08	2	5.34981		kr20190219-02 contact 1	3	2.29398	kr20190219-02 contact 1	0.69651	2.29398
				kr20190620-13	2	4.20207		kr20190219-02 contact 2	4	4.47832	kr20190219-02 contact 2	0.69651	4.47832
				kr20181110-01	2	4.7479		kr20190620-08 contact 1	9	2.12238	kr20190620-08 contact 1	0.838928	2.12238
				kr20181130_01	3	3.77		kr20190620-08 contact 2	8	3.22743	kr20190620-08 contact 2	0.838928	3.22743
								kr20190620-13 contact 1	3	1.83318	kr20190620-13 contact 1	0.686461	1.83318
								kr20190620-13 contact 2	4	2.36889	kr20190620-13 contact 2	0.686461	2.36889
								KR20181110-01 contact 1	4	2.48	KR20181110-01 contact 1	0.836518	2.48
								KR20181110-01 contact 2	2	2.27	KR20181110-01 contact 2	0.836518	2.27
								KR181130_01_con1	1	0.748337	KR181130_01_con1	0.707109	0.748337
								KR181130_01_cont2	2	1.37441	KR181130_01_cont2	0.707109	1.37441
								KR181130_01_con3	1	1.64936	KR181130_01_con3	0.707109	1.64936
