# Supplementary material for: Variability in the Munc13-1 content of excitatory release sites
Source: eLife. 2021 Apr 27;10:e67468. doi: 10.7554/eLife.67468 (PMC8116053; doi:10.7554/eLife.67468)
Supplement: Figure 4—source data 1. [file elife-67468-fig4-data1.xlsx]

## Sheet: Fig4
Munc13-1 (Rb, ZN1312, Synaptic Systems, 126103, 1:200)_5nmGAR		Fig.4 panels I and J															Fig.4 panel K					Fig.4 panel L				Text			Text
			AZ area (um2)			Gold number			Gold /area correlation		Density (gold/um2)			Density /AZ area correlation								# of clusters				Cluster density (1/mm2)			# of gold /cluster
Exp_ID for figure	Experiment	N	Mean	SD	CV	Mean	SD	CV	RS	p-value	Mean	SD	CV	RS	p-value			Mean	SD	N		Mean	SD	CV	N	Mean	SD	CV	Mean	SD	CV	N
Mo1_Exp1	FRL-050520-No5-6	36	0.0711667	0.0263964	0.37091	32.6944	12.3562	0.377929	0.69625	2.41132e-06	476.556	120.795	0.253476	-0.29827	0.07724		Exp mean NND (um2)	0.0256777	0.0095056	159		5.4381	2.50355	0.460373	105	72.9673	26.5307	0.363597	4.52539	3.02167	0.667714	571
Mo2_Exp2	FRL020720-No9-10	65	0.0560615	0.0271321	0.48397	20.1846	11.3989	0.56473	0.72265	1.07452e-11	368.248	142.613	0.387274	-0.09569	0.44828		Random mean NND (um2)	0.0325244	0.00901853			# of clusters /area correlation
Mo1_Exp3	FRL0505020-No1-2	48	0.0891875	0.0425164	0.476708	25.5625	12.5815	0.492185	0.70334	2.47859e-08	304.487	117.531	0.385998	-0.36324	0.01116		Exp NND vs Random NND					RS	0.69327
Mo3_Exp4	FRL0505020-No3-4	10	0.0668	0.0246748	0.369383	25.7	13.0983	0.509663	0.85107	0.00179	384.528	118.592	0.308409	-0.10303	0.777		Wilcoxon p-value	1.16108e-25				p-value	2.49049e-16
		Mean	0.0708039		0.425243	26.0354		0.486127			383.454		0.333789
		SD	0.0138017		0.063692	5.1287		0.0784769			71.0306		0.0650149
	Raw data Fig.5 panel I and J																Raw data					Raw data				Raw data			Raw data
	Experiment		Synapse name	AZ area (um2)	Gold number	Density (gold/um2)											Experiment	Synapse name	Exp mean NND (um2)	Random mean NND (um2)		Experiment	Synapse name	AZ Area	# of clusters	Cluster density (1/mm2)			# of gold /cluster1	# of gold /cluster2	# of gold /cluster3	# of gold /cluster4	# of gold /cluster5	# of gold /cluster6	# of gold /cluster7	# of gold /cluster8	# of gold /cluster9	# of gold /cluster10	# of gold /cluster11	# of gold /cluster12	# of gold /cluster13
	FRL-050520-No5-6		Kv3D-03-No6-25k-s01	0.1	57	570											FRL-050520-No5-6	Kv3D-03-No6-25k-s01	0.0194676	0.024082		FRL-050520-No5-6	Kv3D-03-No6-25k-s03	0.054	5	92.5926			5	3	2	6	2
	FRL-050520-No5-6		Kv3D-03-No6-25k-s03	0.054	22	407.407											FRL-050520-No5-6	Kv3D-03-No6-25k-s03	0.0246657	0.0288383		FRL-050520-No5-6	Kv3D-03-No6-25k-s04	0.051	4	78.4314			17	3	15	2
	FRL-050520-No5-6		Kv3D-03-No6-25k-s04	0.051	37	725.49											FRL-050520-No5-6	Kv3D-03-No6-25k-s04	0.016644	0.0222068		FRL-050520-No5-6	Kv3D-05-No6-30k-s1	0.108	9	83.3333			10	2	3	6	4	4	4	2	5
	FRL-050520-No5-6		Kv3D-04-No6-40k	0.041	21	512.195											FRL-050520-No5-6	Kv3D-04-No6-40k	0.0234932	0.0265814		FRL-050520-No5-6	Kv3D-05-No6-30k-s10	0.047	6	127.66			8	10	5	2	2	8
	FRL-050520-No5-6		Kv3D-05-No6-30k-s10	0.047	36	765.957											FRL-050520-No5-6	Kv3D-05-No6-30k-s10	0.0143312	0.0216652		FRL-050520-No5-6	Kv3D-05-No6-30k-s2	0.121	4	33.0579			2	2	3	9
	FRL-050520-No5-6		Kv3D-05-No6-30k-s1	0.108	46	425.926											FRL-050520-No5-6	Kv3D-05-No6-30k-s1	0.0233802	0.0274199		FRL-050520-No5-6	Kv3D-05-No6-30k-s3	0.062	7	112.903			2	8	2	6	4	6	6
	FRL-050520-No5-6		Kv3D-05-No6-30k-s2	0.121	22	181.818											FRL-050520-No5-6	Kv3D-05-No6-30k-s2	0.0246226	0.0419419		FRL-050520-No5-6	Kv3D-05-No6-30k-s4	0.038	2	52.6316			5	10
	FRL-050520-No5-6		Kv3D-05-No6-30k-s3	0.062	35	564.516											FRL-050520-No5-6	Kv3D-05-No6-30k-s3	0.0195318	0.0245941		FRL-050520-No5-6	Kv3D-05-No6-30k-s5	0.071	5	70.4225			8	5	4	5	3
	FRL-050520-No5-6		Kv3D-05-No6-30k-s4	0.038	16	421.053											FRL-050520-No5-6	Kv3D-05-No6-30k-s4	0.0218001	0.028833		FRL-050520-No5-6	Kv3D-05-No6-30k-s6	0.073	4	54.7945			4	2	7	20
	FRL-050520-No5-6		Kv3D-05-No6-30k-s5	0.071	29	408.451											FRL-050520-No5-6	Kv3D-05-No6-30k-s5	0.0229519	0.028412		FRL-050520-No5-6	Kv3D-05-No6-30k-s7	0.116	11	94.8276			11	9	12	9	2	4	3	4	2	6	2
	FRL-050520-No5-6		Kv3D-05-No6-30k-s6	0.073	35	479.452											FRL-050520-No5-6	Kv3D-05-No6-30k-s6	0.0199695	0.0265397		FRL-050520-No5-6	Kv3D-05-No6-30k-s8	0.108	8	74.0741			3	2	12	14	2	2	4	7
	FRL-050520-No5-6		Kv3D-05-No6-30k-s7	0.116	70	603.448											FRL-050520-No5-6	Kv3D-05-No6-30k-s7	0.0191931	0.0235307		FRL-050520-No5-6	Kv3D-05-No6-30k-s9	0.065	5	76.9231			4	6	3	7	4
	FRL-050520-No5-6		Kv3D-05-No6-30k-s8	0.108	50	462.963											FRL-050520-No5-6	Kv3D-05-No6-30k-s8	0.0205803	0.0265263		FRL-050520-No5-6	Kv3D-07-No6-30k	0.101	5	49.505			11	4	4	14	2
	FRL-050520-No5-6		Kv3D-05-No6-30k-s9	0.065	26	400											FRL-050520-No5-6	Kv3D-05-No6-30k-s9	0.0185471	0.0294248		FRL-050520-No5-6	Kv3mG-D-01-No6-25k-s1	0.078	6	76.9231			7	4	3	14	2	4
	FRL-050520-No5-6		Kv3D-07-No6-30k	0.101	43	425.743											FRL-050520-No5-6	Kv3D-07-No6-30k	0.0259725	0.0275127		FRL-050520-No5-6	Kv3mG-D-01-No6-25k-s2	0.078	9	115.385			4	3	7	6	5	3	6	2	2
	FRL-050520-No5-6		Kv3mG-D-01-No6-25k-s1	0.078	43	551.282											FRL-050520-No5-6	Kv3mG-D-01-No6-25k-s1	0.0217264	0.0246763		FRL-050520-No5-6	Kv3mG-D-01-No6-25k-s3	0.056	6	107.143			3	4	14	3	3	2
	FRL-050520-No5-6		Kv3mG-D-01-No6-25k-s2	0.078	40	512.821											FRL-050520-No5-6	Kv3mG-D-01-No6-25k-s2	0.020778	0.0258809		FRL-050520-No5-6	Kv3mG-D-01-No6-25k-s4	0.107	6	56.0748			2	2	7	5	10	2
	FRL-050520-No5-6		Kv3mG-D-01-No6-25k-s3	0.056	32	571.429											FRL-050520-No5-6	Kv3mG-D-01-No6-25k-s3	0.0179279	0.0248444		FRL-050520-No5-6	Kv3mG-D-01-No6-25k-s7	0.109	4	36.6972			12	4	10	2
	FRL-050520-No5-6		Kv3mG-D-01-No6-25k-s4	0.107	36	336.449											FRL-050520-No5-6	Kv3mG-D-01-No6-25k-s4	0.0242085	0.0309267		FRL-050520-No5-6	Kv3mG-D-02-No6-25k-s01	0.074	4	54.0541			5	3	4	4
	FRL-050520-No5-6		Kv3mG-D-01-No6-25k-s7	0.109	35	321.101											FRL-050520-No5-6	Kv3mG-D-01-No6-25k-s7	0.026221	0.0316165		FRL-050520-No5-6	Kv3mG-D-02-No6-25k-s04	0.065	3	46.1538			4	2	18
	FRL-050520-No5-6		Kv3mG-D-01-No6-25k-s8	0.105	33	314.286											FRL-050520-No5-6	Kv3mG-D-01-No6-25k-s8	0.0265802	0.0321984		FRL-050520-No5-6	Kv3mG-D-02-No6-25k-s05	0.075	5	66.6667			4	13	19	3	5
	FRL-050520-No5-6		Kv3mG-D-02-No6-25k-s01	0.074	20	270.27											FRL-050520-No5-6	Kv3mG-D-02-No6-25k-s01	0.0248768	0.0345617		FRL-050520-No5-6	Kv3mG-D-02-No6-25k-s06	0.051	2	39.2157			6	10
	FRL-050520-No5-6		Kv3mG-D-02-No6-25k-s02	0.053	31	584.906											FRL-050520-No5-6	Kv3mG-D-02-No6-25k-s02	0.0206828	0.0242302		FRL-050520-No5-6	Kv3mG-D-02-No6-25k-s08	0.057	4	70.1754			6	2	5	8
	FRL-050520-No5-6		Kv3mG-D-02-No6-25k-s03	0.04	24	600											FRL-050520-No5-6	Kv3mG-D-02-No6-25k-s03	0.0203981	0.0244634		FRL-050520-No5-6	Kv3mG-D-02-No6-25k-s09	0.056	5	89.2857			6	3	3	3	2
	FRL-050520-No5-6		Kv3mG-D-02-No6-25k-s04	0.065	28	430.769											FRL-050520-No5-6	Kv3mG-D-02-No6-25k-s04	0.0208899	0.0277297		FRL-050520-No5-6	Kv3mG-D-02-No6-25k-s11	0.044	4	90.9091			6	2	9	3
	FRL-050520-No5-6		Kv3mG-D-02-No6-25k-s05	0.075	45	600											FRL-050520-No5-6	Kv3mG-D-02-No6-25k-s05	0.0167831	0.0239114		FRL-050520-No5-6	Kv3mG-D-02-No6-25k-s12	0.074	7	94.5946			7	11	6	3	2	5	7
	FRL-050520-No5-6		Kv3mG-D-02-No6-25k-s06	0.051	21	411.765											FRL-050520-No5-6	Kv3mG-D-02-No6-25k-s06	0.023018	0.0288213		FRL-050520-No5-6	Kv3mG-D-02-No6-25k-s14	0.047	4	85.1064			3	5	3	8
	FRL-050520-No5-6		Kv3mG-D-02-No6-25k-s08	0.057	24	421.053											FRL-050520-No5-6	Kv3mG-D-02-No6-25k-s08	0.0189006	0.0286706		FRL-050520-No5-6	Kv3So-06-No6-30k-s1	0.035	4	114.286			6	7	2	6
	FRL-050520-No5-6		Kv3mG-D-02-No6-25k-s09	0.056	22	392.857											FRL-050520-No5-6	Kv3mG-D-02-No6-25k-s09	0.0229129	0.0295585		FRL-050520-No5-6	Kv3So-06-No6-30k-s2	0.11	9	81.8182			11	5	3	7	3	4	3	6	4
	FRL-050520-No5-6		Kv3mG-D-02-No6-25k-s11	0.044	22	500											FRL-050520-No5-6	Kv3mG-D-02-No6-25k-s11	0.0220024	0.0265501		FRL-050520-No5-6	Kv3So-06-No6-30k-s3	0.057	4	70.1754			8	5	5	4
	FRL-050520-No5-6		Kv3mG-D-02-No6-25k-s12	0.074	44	594.595											FRL-050520-No5-6	Kv3mG-D-02-No6-25k-s12	0.0208032	0.0238135		FRL0505020-No1-2	Kv3-mG1-So-01-s3-No2-25k	0.112	3	26.7857			3	2	12
	FRL-050520-No5-6		Kv3mG-D-02-No6-25k-s13	0.035	16	457.143											FRL-050520-No5-6	Kv3mG-D-02-No6-25k-s13	0.0288119	0.0273995		FRL0505020-No1-2	Kv3-mG1-So-01-s5-No2-25k	0.13	8	61.5385			3	2	2	2	2	3	8	3
	FRL-050520-No5-6		Kv3mG-D-02-No6-25k-s14	0.047	21	446.809											FRL-050520-No5-6	Kv3mG-D-02-No6-25k-s14	0.0212472	0.0278266		FRL0505020-No1-2	Kv3D-04-No2-25k-s1-s2	0.048	1	20.8333			8
	FRL-050520-No5-6		Kv3So-06-No6-30k-s1	0.035	21	600											FRL-050520-No5-6	Kv3So-06-No6-30k-s1	0.0164145	0.0243416		FRL0505020-No1-2	Kv3D-04-No2-25k-s1	0.045	5	111.111			2	2	2	5	7
	FRL-050520-No5-6		Kv3So-06-No6-30k-s2	0.11	49	445.455											FRL-050520-No5-6	Kv3So-06-No6-30k-s2	0.0209984	0.0269524		FRL0505020-No1-2	Kv3D-04-No2-25k-s4	0.071	4	56.338			5	5	3	6
	FRL-050520-No5-6		Kv3So-06-No6-30k-s3	0.057	25	438.596											FRL-050520-No5-6	Kv3So-06-No6-30k-s3	0.0253478	0.0278547		FRL0505020-No1-2	Kv3D-05-No2-25k-s05	0.168	5	29.7619			4	7	4	5	2
	FRL020720-No9-10		K3m1aSo02-s01-No10-30k	0.04	16	400											FRL020720-No9-10	K3m1aSo02-s01-No10-30k	0.0281886	0.0302083		FRL0505020-No1-2	Kv3D-05-No2-25k-s06	0.127	9	70.8661			5	2	5	7	2	5	2	5	3
	FRL020720-No9-10		K3m1aSo02-s02-No10-30k	0.043	11	255.814											FRL020720-No9-10	K3m1aSo02-s02-No10-30k	0.0371067	0.037914		FRL0505020-No1-2	Kv3D-05-No2-25k-s10b	0.158	9	56.962			3	10	6	2	2	2	6	2	2
	FRL020720-No9-10		K3m1aSo02-s03-No10-30k	0.047	14	297.872											FRL020720-No9-10	K3m1aSo02-s03-No10-30k	0.0332862	0.0337021		FRL0505020-No1-2	Kv3D-05-No2-25k-s12	0.091	6	65.9341			2	2	3	3	2	2
	FRL020720-No9-10		K3m1aSo02-s04-No10-30k	0.043	9	209.302											FRL020720-No9-10	K3m1aSo02-s04-No10-30k	0.0301806	0.0422256		FRL0505020-No1-2	Kv3D-05-No2-25k-s13	0.07	4	57.1429			2	2	2	4
	FRL020720-No9-10		K3m1aSo02-s05-No10-30k	0.094	33	351.064											FRL020720-No9-10	K3m1aSo02-s05-No10-30k	0.0244453	0.0303064		FRL0505020-No1-2	Kv3D-05-No2-25k-s14	0.083	5	60.241			5	4	2	5	6
	FRL020720-No9-10		K3m1aSo02-s06-No10-30k	0.074	15	202.703											FRL020720-No9-10	K3m1aSo02-s06-No10-30k	0.03582	0.0406793		FRL0505020-No1-2	Kv3D-05-No2-25k-s15	0.167	9	53.8922			5	2	3	4	2	4	2	6	4
	FRL020720-No9-10		K3m1aSo02-s07-No10-30k	0.111	19	171.171											FRL020720-No9-10	K3m1aSo02-s07-No10-30k	0.0426787	0.0437682		FRL0505020-No1-2	Kv3D-05-No2-25k-s16	0.129	6	46.5116			2	4	3	7	4	8
	FRL020720-No9-10		K3m1aSo02-s08-No10-30k	0.128	41	320.312											FRL020720-No9-10	K3m1aSo02-s08-No10-30k	0.0278775	0.0315831		FRL0505020-No1-2	Kv3D-05-No2-25k-s17	0.218	13	59.633			5	2	5	2	4	2	4	2	2	2	9	2	3
	FRL020720-No9-10		K3m1aSo02-s09-No10-30k	0.039	18	461.538											FRL020720-No9-10	K3m1aSo02-s09-No10-30k	0.0220967	0.0278541		FRL0505020-No1-2	Kv3D-05-No2-25k-s18	0.148	7	47.2973			2	3	2	2	4	8	4
	FRL020720-No9-10		K3m1aSo02-s10-No10-30k	0.068	24	352.941											FRL020720-No9-10	K3m1aSo02-s10-No10-30k	0.0223284	0.0310689		FRL0505020-No1-2	Kv3D-06-No2-25k-s1	0.086	4	46.5116			21	5	2	2
	FRL020720-No9-10		K3m1aSo02-s11-No10-30k	0.053	20	377.358											FRL020720-No9-10	K3m1aSo02-s11-No10-30k	0.020722	0.0305091		FRL0505020-No1-2	Kv3D-06-No2-25k-s2	0.031	4	129.032			7	4	2	6
	FRL020720-No9-10		K3m1aSo02-s12-No10-30k	0.04	8	200											FRL020720-No9-10	K3m1aSo02-s12-No10-30k	0.0307623	0.0432702		FRL0505020-No1-2	Kv3D-07-No2-25k	0.087	4	45.977			4	4	12	2
	FRL020720-No9-10		K3m1aSo02-s13-No10-30k	0.059	29	491.525											FRL020720-No9-10	K3m1aSo02-s13-No10-30k	0.0223667	0.0264924		FRL0505020-No1-2	Kv3D-08-No2-25k-s1	0.142	5	35.2113			5	3	5	2	2
	FRL020720-No9-10		K3m1aSo02-s14-No10-30k	0.057	26	456.14											FRL020720-No9-10	K3m1aSo02-s14-No10-30k	0.023135	0.0272283		FRL0505020-No1-2	Kv3D-08-No2-25k-s2	0.09	7	77.7778			3	2	3	3	3	2	3
	FRL020720-No9-10		K3m1aSo02-s15-No10-30k	0.024	11	458.333											FRL020720-No9-10	K3m1aSo02-s15-No10-30k	0.0253059	0.028369		FRL0505020-No1-2	Kv3D-08-No2-25k-s4	0.06	3	50			2	4	6
	FRL020720-No9-10		K3m1aSo02-s16-No10-30k	0.048	15	312.5											FRL020720-No9-10	K3m1aSo02-s16-No10-30k	0.0321385	0.0333018		FRL0505020-No1-2	Kv3D-rad-No2-25k-s1	0.105	7	66.6667			2	2	2	4	9	4	3
	FRL020720-No9-10		K3m1aSo02-s17-No10-30k	0.018	13	722.222											FRL020720-No9-10	K3m1aSo02-s17-No10-30k	0.0190739	0.0230285		FRL0505020-No1-2	Kv3D-rad-No2-25k-s10	0.072	5	69.4444			2	3	2	7	2
	FRL020720-No9-10		K3m1aSo02-s19-No10-30k	0.028	12	428.571											FRL020720-No9-10	K3m1aSo02-s19-No10-30k	0.0303466	0.0305327		FRL0505020-No1-2	Kv3D-rad-No2-25k-s11	0.062	4	64.5161			7	4	2	3
	FRL020720-No9-10		K3m1aSo02-s20-No10-30k	0.034	6	176.471											FRL020720-No9-10	K3m1aSo02-s20-No10-30k	0.0503378	0.0461751		FRL0505020-No1-2	Kv3D-rad-No2-25k-s12	0.096	7	72.9167			3	2	5	2	4	7	12
	FRL020720-No9-10		K3m1aSo02-s21-No10-30k	0.044	12	272.727											FRL020720-No9-10	K3m1aSo02-s21-No10-30k	0.0253651	0.036431		FRL0505020-No1-2	Kv3D-rad-No2-25k-s13	0.063	2	31.746			4	2
	FRL020720-No9-10		K3m1aSo02-s22-No10-30k	0.067	32	477.612											FRL020720-No9-10	K3m1aSo02-s22-No10-30k	0.0257874	0.0267853		FRL0505020-No1-2	Kv3D-rad-No2-25k-s2	0.128	6	46.875			5	2	4	4	6	3
	FRL020720-No9-10		K3m1aSo02-s23-No10-30k	0.084	34	404.762											FRL020720-No9-10	K3m1aSo02-s23-No10-30k	0.026959	0.0285355		FRL0505020-No1-2	Kv3D-rad-No2-25k-s3	0.116	10	86.2069			2	2	4	2	13	5	2	4	3	4
	FRL020720-No9-10		K3m1aSo02-s24-No10-30kb	0.054	20	370.37											FRL020720-No9-10	K3m1aSo02-s24-No10-30kb	0.0252984	0.0302569		FRL0505020-No1-2	Kv3D-rad-No2-25k-s4	0.059	4	67.7966			5	4	4	5
	FRL020720-No9-10		K3m1aSo02-s25-No10-30k	0.064	26	406.25											FRL020720-No9-10	K3m1aSo02-s25-No10-30k	0.027097	0.0288026		FRL0505020-No1-2	Kv3D-rad-No2-25k-s7	0.059	4	67.7966			3	4	4	14
	FRL020720-No9-10		K3m1aSo02-s26-No10-30k	0.056	30	535.714											FRL020720-No9-10	K3m1aSo02-s26-No10-30k	0.0198713	0.0253028		FRL0505020-No1-2	Kv3D-rad-No2-25k-s8	0.061	4	65.5738			4	2	4	3
	FRL020720-No9-10		K3m1aSo02-s27-No10-30k	0.034	14	411.765											FRL020720-No9-10	K3m1aSo02-s27-No10-30k	0.0210125	0.0295102		FRL0505020-No1-2	Kv3D-rad-No2-25k-s9	0.122	13	106.557			4	2	4	2	7	2	8	4	3	8	3	2	8
	FRL020720-No9-10		K3m1aSo02-s28-No10-30k	0.035	20	571.429											FRL020720-No9-10	K3m1aSo02-s28-No10-30k	0.0203994	0.0250692		FRL0505020-No1-2	Kv3So-01-No2-s1-25k	0.048	3	62.5			6	8	2
	FRL020720-No9-10		K3m1aSo02-s29-No10-30k	0.043	10	232.558											FRL020720-No9-10	K3m1aSo02-s29-No10-30k	0.0361071	0.0390995		FRL0505020-No1-2	Kv3So-01-No2-s2-25k	0.086	5	58.1395			2	10	2	5	6
	FRL020720-No9-10		K3m1aSo02-s30-No10-30k	0.018	6	333.333											FRL020720-No9-10	K3m1aSo02-s30-No10-30k	0.0205013	0.0358169		FRL0505020-No1-2	Kv3So-02-No2-s2-25k	0.16	8	50			2	2	4	3	3	6	4	13
	FRL020720-No9-10		K3m1aSo02-s31-No10-30k	0.036	2	55.5556											FRL020720-No9-10	K3m1aSo02-s31-No10-30k	0.104278	0.0978285		FRL0505020-No1-2	Kv3So-03-No2-25k-s2	0.043	4	93.0233			5	4	3	4
	FRL020720-No9-10		K3m1aSo02-s31-s35-No10-30k	0.047	23	489.362											FRL020720-No9-10	K3m1aSo02-s31-s35-No10-30k	0.0225865	0.026752		FRL020720-No9-10	K3m1aSo02-s02-No10-30k	0.043	1	23.2558			7
	FRL020720-No9-10		K3m1aSo02-s32-No10-30k	0.042	21	500											FRL020720-No9-10	K3m1aSo02-s32-No10-30k	0.0217417	0.0262348		FRL020720-No9-10	K3m1aSo02-s03-No10-30k	0.047	3	63.8298			2	3	3
	FRL020720-No9-10		K3m1aSo02-s36-No10-30k	0.059	11	186.441											FRL020720-No9-10	K3m1aSo02-s36-No10-30k	0.0377176	0.042838		FRL020720-No9-10	K3m1aSo02-s05-No10-30k	0.094	5	53.1915			9	2	3	2	7
	FRL020720-No9-10		K3m1aSo02-s38-No10-30k	0.068	9	132.353											FRL020720-No9-10	K3m1aSo02-s38-No10-30k	0.060913	0.0521643		FRL020720-No9-10	K3m1aSo02-s08-No10-30k	0.128	8	62.5			5	7	2	4	7	4	2	2
	FRL020720-No9-10		K3m1aSo02-s39-No10-30k	0.039	18	461.538											FRL020720-No9-10	K3m1aSo02-s39-No10-30k	0.0196848	0.0280556		FRL020720-No9-10	K3m1aSo02-s10-No10-30k	0.068	6	88.2353			2	5	2	8	2	2
	FRL020720-No9-10		K3m1aSo02-s40-No10-30k	0.056	18	321.429											FRL020720-No9-10	K3m1aSo02-s40-No10-30k	0.0256798	0.0324511		FRL020720-No9-10	K3m1aSo02-s13-No10-30k	0.059	4	67.7966			5	6	9	5
	FRL020720-No9-10		K3m1aSo02-s41-No10-40k	0.05	13	260											FRL020720-No9-10	K3m1aSo02-s41-No10-40k	0.0291507	0.0365728		FRL020720-No9-10	K3m1aSo02-s22-No10-30k	0.067	6	89.5522			7	4	5	2	3	2
	FRL020720-No9-10		Kv3m1aSo03-No10-30k-s10	0.086	52	604.651											FRL020720-No9-10	Kv3m1aSo03-No10-30k-s10	0.0193435	0.023776		FRL020720-No9-10	K3m1aSo02-s24-No10-30kb	0.054	3	55.5556			9	2	5
	FRL020720-No9-10		Kv3m1aSo03-No10-30k-s11	0.059	9	152.542											FRL020720-No9-10	Kv3m1aSo03-No10-30k-s11	0.0427976	0.0484282		FRL020720-No9-10	K3m1aSo02-s26-No10-30k	0.056	8	142.857			9	5	2	2	2	4	3	2
	FRL020720-No9-10		Kv3m1aSo03-No10-30k-s12	0.051	29	568.627											FRL020720-No9-10	Kv3m1aSo03-No10-30k-s12	0.0206316	0.0247612		FRL020720-No9-10	K3m1aSo02-s27-No10-30k	0.034	3	88.2353			8	2	2
	FRL020720-No9-10		Kv3m1aSo03-No10-30k-s13	0.114	30	263.158											FRL020720-No9-10	Kv3m1aSo03-No10-30k-s13	0.0272521	0.0350627		FRL020720-No9-10	K3m1aSo02-s28-No10-30k	0.035	3	85.7143			5	5	8
	FRL020720-No9-10		Kv3m1aSo03-No10-30k-s14	0.027	15	555.556											FRL020720-No9-10	Kv3m1aSo03-No10-30k-s14	0.0196439	0.0261621		FRL020720-No9-10	K3m1aSo02-s31-s35-No10-30k	0.047	4	85.1064			7	2	6	3
	FRL020720-No9-10		Kv3m1aSo03-No10-30k-s15	0.041	5	121.951											FRL020720-No9-10	Kv3m1aSo03-No10-30k-s15	0.0175638	0.0584847		FRL020720-No9-10	K3m1aSo02-s32-No10-30k	0.042	4	95.2381			5	8	3	2
	FRL020720-No9-10		Kv3m1aSo03-No10-30k-s1	0.05	25	500											FRL020720-No9-10	Kv3m1aSo03-No10-30k-s1	0.0193517	0.0262325		FRL020720-No9-10	K3m1aSo02-s40-No10-30k	0.056	3	53.5714			6	4	2
	FRL020720-No9-10		Kv3m1aSo03-No10-30k-s21	0.029	5	172.414											FRL020720-No9-10	Kv3m1aSo03-No10-30k-s21	0.0478687	0.0494513		FRL020720-No9-10	Kv3m1aSo03-No10-30k-s10	0.086	9	104.651			2	11	2	3	9	6	4	5	7
	FRL020720-No9-10		Kv3m1aSo03-No10-30k-s22	0.101	49	485.149											FRL020720-No9-10	Kv3m1aSo03-No10-30k-s22	0.0201273	0.0260403		FRL020720-No9-10	Kv3m1aSo03-No10-30k-s13	0.114	8	70.1754			3	5	3	5	2	3	2	2
	FRL020720-No9-10		Kv3m1aSo03-No10-30k-s23	0.045	10	222.222											FRL020720-No9-10	Kv3m1aSo03-No10-30k-s23	0.0248002	0.0407001		FRL020720-No9-10	Kv3m1aSo03-No10-30k-s15	0.041	2	48.7805			2	2
	FRL020720-No9-10		Kv3m1aSo03-No10-30k-s24	0.058	26	448.276											FRL020720-No9-10	Kv3m1aSo03-No10-30k-s24	0.0247092	0.0278576		FRL020720-No9-10	Kv3m1aSo03-No10-30k-s2	0.087	5	57.4713			13	3	2	7	5
	FRL020720-No9-10		Kv3m1aSo03-No10-30k-s25	0.053	24	452.83											FRL020720-No9-10	Kv3m1aSo03-No10-30k-s25	0.0192759	0.0278033		FRL020720-No9-10	Kv3m1aSo03-No10-30k-s22	0.101	11	108.911			3	2	2	6	4	4	4	3	5	2	8
	FRL020720-No9-10		Kv3m1aSo03-No10-30k-s27	0.031	16	516.129											FRL020720-No9-10	Kv3m1aSo03-No10-30k-s27	0.0202615	0.026372		FRL020720-No9-10	Kv3m1aSo03-No10-30k-s23	0.045	2	44.4444			2	7
	FRL020720-No9-10		Kv3m1aSo03-No10-30k-s28	0.079	34	430.38											FRL020720-No9-10	Kv3m1aSo03-No10-30k-s28	0.0241665	0.0279337		FRL020720-No9-10	Kv3m1aSo03-No10-30k-s25	0.053	5	94.3396			4	2	3	2	11
	FRL020720-No9-10		Kv3m1aSo03-No10-30k-s29	0.033	14	424.242											FRL020720-No9-10	Kv3m1aSo03-No10-30k-s29	0.0234491	0.0292595		FRL020720-No9-10	Kv3m1aSo03-No10-30k-s27	0.031	3	96.7742			5	4	5
	FRL020720-No9-10		Kv3m1aSo03-No10-30k-s2	0.087	33	379.31											FRL020720-No9-10	Kv3m1aSo03-No10-30k-s2	0.0214619	0.0292757		FRL020720-No9-10	Kv3m1aSo03-No10-30k-s3	0.07	6	85.7143			4	3	2	5	5	6
	FRL020720-No9-10		Kv3m1aSo03-No10-30k-s3	0.07	28	400											FRL020720-No9-10	Kv3m1aSo03-No10-30k-s3	0.0210962	0.0287448		FRL020720-No9-10	Kv3m1aSo03-No10-30k-s4	0.08	7	87.5			2	5	3	2	6	4	3
	FRL020720-No9-10		Kv3m1aSo03-No10-30k-s4	0.08	30	375											FRL020720-No9-10	Kv3m1aSo03-No10-30k-s4	0.0209014	0.0295449		FRL020720-No9-10	Kv3m1aSo03-No10-30k-s7	0.146	11	75.3425			2	2	8	3	2	4	2	3	3	2	12
	FRL020720-No9-10		Kv3m1aSo03-No10-30k-s5-s6	0.038	13	342.105											FRL020720-No9-10	Kv3m1aSo03-No10-30k-s5-s6	0.0253154	0.0320555		FRL020720-No9-10	Kv3m1aSo03-No10-30k-s8	0.024	3	125			4	7	3
	FRL020720-No9-10		Kv3m1aSo03-No10-30k-s5	0.05	25	500											FRL020720-No9-10	Kv3m1aSo03-No10-30k-s5	0.0244059	0.0265934		FRL020720-No9-10	Kv3m1aSo03-No10-30k-s9	0.029	2	68.9655			2	5
	FRL020720-No9-10		Kv3m1aSo03-No10-30k-s7	0.146	52	356.164											FRL020720-No9-10	Kv3m1aSo03-No10-30k-s7	0.0226637	0.0297232		FRL020720-No9-10	m1aKv3-SoD-01-s1-No10-30k	0.074	9	121.622			5	7	2	3	2	2	2	2	3
	FRL020720-No9-10		Kv3m1aSo03-No10-30k-s8	0.024	16	666.667											FRL020720-No9-10	Kv3m1aSo03-No10-30k-s8	0.0219137	0.0238524		FRL020720-No9-10	m1aKv3-SoD-01-s2-No10-30k	0.121	5	41.3223			2	2	7	3	10
	FRL020720-No9-10		Kv3m1aSo03-No10-30k-s9	0.029	9	310.345											FRL020720-No9-10	Kv3m1aSo03-No10-30k-s9	0.0240205	0.0351761		FRL020720-No9-10	m1aKv3-SoD-01-s5-No10-30k	0.037	1	27.027			4
	FRL020720-No9-10		m1aKv3-SoD-01-s1-No10-30k	0.074	34	459.459											FRL020720-No9-10	m1aKv3-SoD-01-s1-No10-30k	0.0199476	0.0271247		FRL020720-No9-10	m1aKv3D-02-s1-No10-30k	0.045	5	111.111			2	3	3	3	2
	FRL020720-No9-10		m1aKv3-SoD-01-s2-No10-30k	0.121	32	264.463											FRL020720-No9-10	m1aKv3-SoD-01-s2-No10-30k	0.0296431	0.0350027		FRL020720-No9-10	m1aKv3D-02-s2-No10-30k	0.042	4	95.2381			7	3	3	3
	FRL020720-No9-10		m1aKv3-SoD-01-s5-No10-30k	0.037	4	108.108											FRL020720-No9-10	m1aKv3-SoD-01-s5-No10-30k	0.017132	0.0651539		FRL020720-No9-10	Kv3m1aSo03-No10-30k-s1	0.05	6	120			5	3	5	3	3	3
	FRL020720-No9-10		m1aKv3D-02-s1-No10-30k	0.045	14	311.111											FRL020720-No9-10	m1aKv3D-02-s1-No10-30k	0.0167684	0.0333549		FRL0505020-No3-4	Kv3D-01-No4-30k-s1	0.086	7	81.3953			4	3	2	3	3	3	5
	FRL020720-No9-10		m1aKv3D-02-s2-No10-30k	0.042	20	476.19											FRL020720-No9-10	m1aKv3D-02-s2-No10-30k	0.0239164	0.02709		FRL0505020-No3-4	Kv3D-03-No4-30k-s2	0.053	7	132.075			3	3	6	2	2	6	2
	FRL0505020-No1-2		Kv3-mG1-So-01-No2-s1-2-20k	0.11	22	200											FRL0505020-No1-2	Kv3-mG1-So-01-No2-s1-2-20k	0.0322215	0.039646		FRL0505020-No3-4	Kv3D-04-Pyr-No4-30k-s1	0.102	6	58.8235			4	3	5	5	2	2
	FRL0505020-No1-2		Kv3-mG1-So-01-s3-No2-25k	0.112	22	196.429											FRL0505020-No1-2	Kv3-mG1-So-01-s3-No2-25k	0.0302123	0.0406625		FRL0505020-No3-4	Kv3D-04-Pyr-No4-30k-s2	0.091	8	87.9121			15	3	5	3	10	2	4	9
	FRL0505020-No1-2		Kv3-mG1-So-01-s5-No2-25k	0.13	31	238.462											FRL0505020-No1-2	Kv3-mG1-So-01-s5-No2-25k	0.0286872	0.0361479		FRL0505020-No3-4	Kv3D-04-Pyr-No4-30k-s3	0.051	4	78.4314			4	14	2	3
	FRL0505020-No1-2		Kv3D-04-No2-25k-s1-s2	0.048	11	229.167											FRL0505020-No1-2	Kv3D-04-No2-25k-s1-s2	0.0353047	0.039606		FRL0505020-No3-4	Kv3D-04-Pyr-No4-30k-s5	0.087	6	68.9655			2	10	4	5	6	4
	FRL0505020-No1-2		Kv3D-04-No2-25k-s1	0.045	19	422.222											FRL0505020-No1-2	Kv3D-04-No2-25k-s1	0.0171164	0.0290556
	FRL0505020-No1-2		Kv3D-04-No2-25k-s3	0.055	12	218.182											FRL0505020-No1-2	Kv3D-04-No2-25k-s3	0.0380172	0.0412294
	FRL0505020-No1-2		Kv3D-04-No2-25k-s4	0.071	22	309.859											FRL0505020-No1-2	Kv3D-04-No2-25k-s4	0.0213061	0.033102
	FRL0505020-No1-2		Kv3D-05-No2-25k-s01	0.051	23	450.98											FRL0505020-No1-2	Kv3D-05-No2-25k-s01	0.0246607	0.0275095
	FRL0505020-No1-2		Kv3D-05-No2-25k-s02	0.06	13	216.667											FRL0505020-No1-2	Kv3D-05-No2-25k-s02	0.0292727	0.0395617
	FRL0505020-No1-2		Kv3D-05-No2-25k-s03	0.043	10	232.558											FRL0505020-No1-2	Kv3D-05-No2-25k-s03	0.0343202	0.0393245
	FRL0505020-No1-2		Kv3D-05-No2-25k-s05	0.168	31	184.524											FRL0505020-No1-2	Kv3D-05-No2-25k-s05	0.028192	0.0411888
	FRL0505020-No1-2		Kv3D-05-No2-25k-s06	0.127	44	346.457											FRL0505020-No1-2	Kv3D-05-No2-25k-s06	0.0235827	0.0305719
	FRL0505020-No1-2		Kv3D-05-No2-25k-s08	0.05	13	260											FRL0505020-No1-2	Kv3D-05-No2-25k-s08	0.0340199	0.0371723
	FRL0505020-No1-2		Kv3D-05-No2-25k-s10b	0.158	43	272.152											FRL0505020-No1-2	Kv3D-05-No2-25k-s10b	0.0253795	0.033891
	FRL0505020-No1-2		Kv3D-05-No2-25k-s11	0.039	15	384.615											FRL0505020-No1-2	Kv3D-05-No2-25k-s11	0.0272695	0.030665
	FRL0505020-No1-2		Kv3D-05-No2-25k-s12	0.091	18	197.802											FRL0505020-No1-2	Kv3D-05-No2-25k-s12	0.0327001	0.0407385
	FRL0505020-No1-2		Kv3D-05-No2-25k-s13	0.07	13	185.714											FRL0505020-No1-2	Kv3D-05-No2-25k-s13	0.0250553	0.0426612
	FRL0505020-No1-2		Kv3D-05-No2-25k-s14	0.083	25	301.205											FRL0505020-No1-2	Kv3D-05-No2-25k-s14	0.0217181	0.0331655
	FRL0505020-No1-2		Kv3D-05-No2-25k-s15	0.167	35	209.581											FRL0505020-No1-2	Kv3D-05-No2-25k-s15	0.0219559	0.038491
	FRL0505020-No1-2		Kv3D-05-No2-25k-s16	0.129	34	263.566											FRL0505020-No1-2	Kv3D-05-No2-25k-s16	0.0246041	0.0344596
	FRL0505020-No1-2		Kv3D-05-No2-25k-s17	0.218	54	247.706											FRL0505020-No1-2	Kv3D-05-No2-25k-s17	0.0241	0.0353469
	FRL0505020-No1-2		Kv3D-05-No2-25k-s18	0.148	33	222.973											FRL0505020-No1-2	Kv3D-05-No2-25k-s18	0.0251827	0.0373629
	FRL0505020-No1-2		Kv3D-06-No2-25k-s1	0.086	32	372.093											FRL0505020-No1-2	Kv3D-06-No2-25k-s1	0.0209069	0.029588
	FRL0505020-No1-2		Kv3D-06-No2-25k-s2	0.031	20	645.161											FRL0505020-No1-2	Kv3D-06-No2-25k-s2	0.0181262	0.0237116
	FRL0505020-No1-2		Kv3D-07-No2-25k	0.087	24	275.862											FRL0505020-No1-2	Kv3D-07-No2-25k	0.0198608	0.0347079
	FRL0505020-No1-2		Kv3D-08-No2-25k-s1	0.142	25	176.056											FRL0505020-No1-2	Kv3D-08-No2-25k-s1	0.0311745	0.0422297
	FRL0505020-No1-2		Kv3D-08-No2-25k-s2	0.09	25	277.778											FRL0505020-No1-2	Kv3D-08-No2-25k-s2	0.0286681	0.0341066
	FRL0505020-No1-2		Kv3D-08-No2-25k-s3	0.047	23	489.362											FRL0505020-No1-2	Kv3D-08-No2-25k-s3	0.0231735	0.0266185
	FRL0505020-No1-2		Kv3D-08-No2-25k-s4	0.06	14	233.333											FRL0505020-No1-2	Kv3D-08-No2-25k-s4	0.0294938	0.0379628
	FRL0505020-No1-2		Kv3D-rad-No2-25k-s10	0.072	20	277.778											FRL0505020-No1-2	Kv3D-rad-No2-25k-s10	0.0232396	0.0347271
	FRL0505020-No1-2		Kv3D-rad-No2-25k-s11	0.062	19	306.452											FRL0505020-No1-2	Kv3D-rad-No2-25k-s11	0.0231491	0.0331248
	FRL0505020-No1-2		Kv3D-rad-No2-25k-s12	0.096	40	416.667											FRL0505020-No1-2	Kv3D-rad-No2-25k-s12	0.0206753	0.0277502
	FRL0505020-No1-2		Kv3D-rad-No2-25k-s13	0.063	10	158.73											FRL0505020-No1-2	Kv3D-rad-No2-25k-s13	0.0386061	0.0458352
	FRL0505020-No1-2		Kv3D-rad-No2-25k-s1	0.105	30	285.714											FRL0505020-No1-2	Kv3D-rad-No2-25k-s1	0.0255	0.0337609
	FRL0505020-No1-2		Kv3D-rad-No2-25k-s2	0.128	33	257.812											FRL0505020-No1-2	Kv3D-rad-No2-25k-s2	0.0244184	0.0344196
	FRL0505020-No1-2		Kv3D-rad-No2-25k-s3	0.116	45	387.931											FRL0505020-No1-2	Kv3D-rad-No2-25k-s3	0.0208778	0.0286251
	FRL0505020-No1-2		Kv3D-rad-No2-25k-s4	0.059	21	355.932											FRL0505020-No1-2	Kv3D-rad-No2-25k-s4	0.0224506	0.0309353
	FRL0505020-No1-2		Kv3D-rad-No2-25k-s5	0.093	10	107.527											FRL0505020-No1-2	Kv3D-rad-No2-25k-s5	0.0574795	0.05677
	FRL0505020-No1-2		Kv3D-rad-No2-25k-s7	0.059	31	525.424											FRL0505020-No1-2	Kv3D-rad-No2-25k-s7	0.0230075	0.0252906
	FRL0505020-No1-2		Kv3D-rad-No2-25k-s8	0.061	14	229.508											FRL0505020-No1-2	Kv3D-rad-No2-25k-s8	0.0236911	0.0384274
	FRL0505020-No1-2		Kv3D-rad-No2-25k-s9	0.122	63	516.393											FRL0505020-No1-2	Kv3D-rad-No2-25k-s9	0.0205233	0.025224
	FRL0505020-No1-2		Kv3So-01-No2-s1-25k	0.048	18	375											FRL0505020-No1-2	Kv3So-01-No2-s1-25k	0.0248835	0.0303698
	FRL0505020-No1-2		Kv3So-01-No2-s2-25k	0.086	29	337.209											FRL0505020-No1-2	Kv3So-01-No2-s2-25k	0.0209291	0.0315279
	FRL0505020-No1-2		Kv3So-02-No2-s1-25k	0.082	48	585.366											FRL0505020-No1-2	Kv3So-02-No2-s1-25k	0.0176513	0.0239437
	FRL0505020-No1-2		Kv3So-02-No2-s2-25k	0.16	45	281.25											FRL0505020-No1-2	Kv3So-02-No2-s2-25k	0.0232593	0.0336591
	FRL0505020-No1-2		Kv3So-03-No2-25k-s2	0.043	18	418.605											FRL0505020-No1-2	Kv3So-03-No2-25k-s2	0.0200354	0.0288845
	FRL0505020-No1-2		Kv3So-03-No2-25k-s3	0.065	10	153.846											FRL0505020-No1-2	Kv3So-03-No2-25k-s3	0.0286966	0.0480149
	FRL0505020-No1-2		Kv3So-03-No2-25k-s4	0.045	17	377.778											FRL0505020-No1-2	Kv3So-03-No2-25k-s4	0.0287656	0.030134
	FRL0505020-No3-4		Kv3D-01-No4-30k-s1	0.086	27	313.953											FRL0505020-No3-4	Kv3D-01-No4-30k-s1	0.0247604	0.0323928
	FRL0505020-No3-4		Kv3D-03-No4-30k-s1	0.066	17	257.576											FRL0505020-No3-4	Kv3D-03-No4-30k-s1	0.037152	0.0363601
	FRL0505020-No3-4		Kv3D-03-No4-30k-s2	0.053	27	509.434											FRL0505020-No3-4	Kv3D-03-No4-30k-s2	0.0213267	0.026122
	FRL0505020-No3-4		Kv3D-03-No4-30k-s3	0.026	8	307.692											FRL0505020-No3-4	Kv3D-03-No4-30k-s3	0.0324667	0.0351537
	FRL0505020-No3-4		Kv3D-04-Pyr-No4-30k-s1	0.102	28	274.51											FRL0505020-No3-4	Kv3D-04-Pyr-No4-30k-s1	0.0261289	0.0337778
	FRL0505020-No3-4		Kv3D-04-Pyr-No4-30k-s2	0.091	56	615.385											FRL0505020-No3-4	Kv3D-04-Pyr-No4-30k-s2	0.0183348	0.0233829
	FRL0505020-No3-4		Kv3D-04-Pyr-No4-30k-s3	0.051	24	470.588											FRL0505020-No3-4	Kv3D-04-Pyr-No4-30k-s3	0.0193195	0.0273264
	FRL0505020-No3-4		Kv3D-04-Pyr-No4-30k-s4	0.067	19	283.582											FRL0505020-No3-4	Kv3D-04-Pyr-No4-30k-s4	0.0243264	0.0342027
	FRL0505020-No3-4		Kv3D-04-Pyr-No4-30k-s5	0.087	35	402.299											FRL0505020-No3-4	Kv3D-04-Pyr-No4-30k-s5	0.019071	0.0286143
	FRL0505020-No3-4		Kv3D-04-Pyr-No4-30k-s8	0.039	16	410.256											FRL0505020-No3-4	Kv3D-04-Pyr-No4-30k-s8	0.0302959	0.0294633
