# Supplementary material for: Variability in the Munc13-1 content of excitatory release sites
Source: eLife. 2021 Apr 27;10:e67468. doi: 10.7554/eLife.67468 (PMC8116053; doi:10.7554/eLife.67468)
Supplement: Figure 5—source data 1. [file elife-67468-fig5-data1.xlsx]

## Sheet: Fig5 
	Fig.5 Panel C			Fig.5 Panel D
	PSD-95 (Gp, ZN1181, Snaptic Systems 124014, 1:500)_5nm GAGp, Exp071720_No6, P49 female C57Bl/6J	Gold /PSD area correlation		Density /PSD area correlation		Density (gold / mm2)
		RS	p-value	RS	p-value	Mean	SD	CV	N
	Dendrite	0.95855	4.916e-14	-0.11538	0.58285	496.579	44.6638	0.089943	25
	Spine	0.96184	1.9465e-18	-0.32551	0.06907	509.52	49.8958	0.0979272	32
	Raw data
	Image name	Den/Sp	PSD area (um2)	Gold	Density (gold / mm2)
	Mir-Den-05-mid-ori	Den	0.218515	87	398.142
	Mir-Sp-11-sup-ori	Sp	0.0864851	41	474.07
	Mir-Sp-13-mid-ori	Den	0.0395831	21	530.529
	Mir-Sp-18-Rad	Den	0.0499558	22	440.389
	Mir-Sp-10-mid-ori	Sp	0.089846	53	589.898
	Mir-Sp-19-Rad	Sp	0.0450343	21	466.311
	Mir-Sp-20-Rad	Sp	0.172722	74	428.435
	Mir-Sp-03-mid-ori	Sp	0.081227	39	480.136
	Mir-Den-06-sup-ori	Den	0.0834169	37	443.555
	Mir-Den-12-mid-ori	Den	0.109363	61	557.774
	Mir-Den-7-mid-ori	Den	0.0818522	45	549.771
	Mir-Den-9-mid-ori	Den	0.0596482	25	419.124
	Mir-Sp-02-mid-ori	Sp	0.0538123	24	445.994
	Den-ori-PSD-17	Den	0.124663	59	473.276
	Den-ori-PSD-18	Den	0.0740095	39	526.96
	Den-ori-PSD-19	Den	0.0759508	40	526.656
	Den-Rad-PSD-01	Den	0.0565116	27	477.778
	Den-Rad-PSD-03	Den	0.0542617	27	497.588
	Den-Rad-PSD-04	Den	0.0489587	23	469.784
	Den-Rad-PSD-06	Den	0.0976038	46	471.293
	Den-Rad-PSD-08	Den	0.0807944	39	482.707
	Den-Rad-PSD-10	Den	0.165476	78	471.366
	Den-Rad-PSD-12	Den	0.170114	87	511.421
	Den-Rad-PSD-13	Den	0.0868816	39	448.887
	Den-Rad-PSD-14	Den	0.11611	63	542.587
	Den-Rad-PSD-16	Den	0.0475076	26	547.281
	Den-Rad-PSD-20	Den	0.140967	73	517.852
	Den-Rad-PSD-21	Den	0.0635611	31	487.72
	Den-Rad-PSD-22	Den	0.0690421	37	535.905
	Den-Rad-PSD-23	Den	0.0717503	39	543.552
	Den-Rad-PSD-24	Sp	0.0855583	39	455.83
	Den-Rad-PSD-25	SP	0.0556234	28	503.385
	Sp-Rad-03	Sp	0.0532248	26	488.494
	Sp-Rad-20	Den	0.0589791	32	542.565
	Sp-Rad-53	Sp	0.0774921	37	477.468
	Sp-Rad-59	Sp	0.0425272	22	517.315
	Sp-ori-68	Sp	0.0411081	24	583.826
	Sp-ori-69	Sp	0.0501071	27	538.846
	Sp-Rad-01	Sp	0.142077	81	570.112
	Sp-Rad-08	Sp	0.14148	68	480.632
	Sp-Rad-12 ?	Sp	0.135133	77	569.808
	Sp-Rad-13	Sp	0.0804078	44	547.211
	Sp-Rad-16	Sp	0.0624229	30	480.593
	Sp-Rad-18	Sp	0.0572912	30	523.64
	Sp-Rad-23	Sp	0.0633938	32	504.781
	Sp-Rad-26	Sp	0.0743488	42	564.905
	Sp-Rad-31	Sp	0.0535395	31	579.012
	Sp-Rad-33	Sp	0.047554	23	483.66
	Sp-Rad-35	Sp	0.0931062	53	569.243
	Sp-Rad-47	Sp	0.0404573	23	568.501
	Sp-Rad-48	Sp	0.162356	74	455.788
	Sp-Rad-50	Sp	0.0955585	46	481.38
	Sp-Rad-55	Sp	0.0830424	44	529.85
	Sp-Rad-58	Sp	0.106297	51	479.789
	Sp-Rad-60	Sp	0.0398527	23	577.125
	Sp-Rad-65	Sp	0.163538	69	421.92
	Sp-Rad-66	Sp	0.0771427	36	466.668
