# Supplementary material for: Variability in the Munc13-1 content of excitatory release sites
Source: eLife. 2021 Apr 27;10:e67468. doi: 10.7554/eLife.67468 (PMC8116053; doi:10.7554/eLife.67468)
Supplement: Figure 6—figure supplement 1—source data 1. [file elife-67468-fig6-figsupp1-data1.xlsx]

## Sheet: Fig 6 S1
Fig.6 S1 panel D			Fig.6 S1 panel E		sample:	Cell3: KR190606_06
Cell 3			Cell 3
Normalized Munc13-1 intensity	Normalized PSD95 intensity		Munc13-1/PSD95	Normalized PSD95 intensity
1.21579	1.36104		0.86496	1.36104
1.79025	1.38169		1.25462	1.38169
0.92012	0.69879		1.27498	0.69879
0.97044	0.64721		1.45188	0.64721
1.13252	0.85541		1.28198	0.85541
0.88086	1.74402		0.48906	1.74402
1.15519	1.13796		0.98296	1.13796
1.19237	1.0936		1.05575	1.0936
1.27516	1.29673		0.95219	1.29673
1.22188	3.26909		0.36192	3.26909
1.74517	1.15345		1.46504	1.15345
2.10164	1.6729		1.21646	1.6729
1.02006	0.73447		1.34482	0.73447
0.8075	0.62372		1.2536	0.62372
0.80103	0.65657		1.18134	0.65657
0.56093	0.78575		0.69125	0.78575
1.08331	0.73881		1.41981	0.73881
1.20137	1.1798		0.98599	1.1798
1.85017	0.95645		1.87308	0.95645
1.26451	1.08941		1.12394	1.08941
0.08595	0.56746		0.14667	0.56746
1.02121	1.18123		0.83712	1.18123
1.59489	0.90122		1.7136	0.90122
0.88553	0.91837		0.93367	0.91837
0.55541	0.66083		0.81383	0.66083
1.93591	1.91411		0.97932	1.91411
1.09278	0.87962		1.20294	0.87962
0.56856	0.53951		1.02043	0.53951
1.93763	1.40534		1.33505	1.40534
1.83419	1.76347		1.00713	1.76347
0.81716	1.08331		0.7304	1.08331
0.52051	0.77744		0.6483	0.77744
1.00829	1.22278		0.79844	1.22278
1.01568	0.72293		1.36041	0.72293
0.40429	0.60764		0.64426	0.60764
0.9995	0.69529		1.39195	0.69529
1.17102	1.21755		0.9313	1.21755
0.52909	0.73183		0.70004	0.73183
0.89577	0.88569		0.97932	0.88569
0.9843	1.41995		0.67122	1.41995
0.6197	0.75193		0.79802	0.75193
0.05637	0.66486		0.0821	0.66486
0.61169	0.66592		0.88944	0.66592
0.07393	1.70918		0.04189	1.70918
0.82633	0.53202		1.50395	0.53202
1.45946	0.89408		1.5806	0.89408
1.25513	0.87977		1.38143	0.87977
1.02759	0.94614		1.05165	0.94614
0.5	0.37892		1.2777	0.37892
0.84966	0.56001		1.46912	0.56001
0.06405	0.59765		0.10377	0.59765
0.95129	0.70922		1.29881	0.70922
0.65682	0.53789		1.18238	0.53789
