# Supplementary material for: Variability in the Munc13-1 content of excitatory release sites
Source: eLife. 2021 Apr 27;10:e67468. doi: 10.7554/eLife.67468 (PMC8116053; doi:10.7554/eLife.67468)
Supplement: Figure 6—source data 1. [file elife-67468-fig6-data1.xlsx]

## Sheet: Fig 6
Fig.6 panel D					Fig.6 panel E					samples:	Cell1: KR191003_C2
Cell 1		Cell 2			Cell 1		Cell 2				Cell2: KR190219_01
Normalized PSD95	Normalized Munc13-1	Normalized PSD95	Normalized Munc13-1		Normalized PSD95	Munc13-1/PSD95	Normalized PSD95	Munc13-1/PSD95
1.51413	1.56428	1.15416	1.2969		1.51413	0.86241	1.15416	1.04694
1.16577	1.56046	2.08322	1.26092		1.16577	1.11738	2.08322	0.56395
1.14561	2.02822	0.91802	1.01048		1.14561	1.47789	0.91802	1.02556
0.6113	1.10124	1.25208	0.9003		0.6113	1.5038	1.25208	0.66995
1.16757	0.93285	1.73024	1.32623		1.16757	0.66695	1.73024	0.71416
1.1052	1.49287	1.33056	1.03313		1.1052	1.12757	1.33056	0.72344
1.53618	1.40985	1.11078	1.10368		1.53618	0.76611	1.11078	0.92576
1.89545	1.60812	0.69393	1.52396		1.89545	0.70822	0.69393	2.04616
1.6342	1.6173	0.63207	0.48677		1.6342	0.82613	0.63207	0.71753
0.84696	1.16308	0.93563	1.34812		0.84696	1.14634	0.93563	1.34248
1.34019	0.92068	0.75458	1.19152		1.34019	0.57346	0.75458	1.47124
0.99342	0.90818	0.89394	0.80628		0.99342	0.76314	0.89394	0.84035
1.39776	1.526	1.28504	0.98849		1.39776	0.91135	1.28504	0.71671
1.57853	0.6332	1.06132	0.77606		1.57853	0.33485	1.06132	0.68129
1.29523	1.31412	0.91973	0.69994		1.29523	0.84694	0.91973	0.70907
0.75441	0.94571	1.17931	1.16459		0.75441	1.04644	1.17931	0.92008
0.6978	1.64634	0.68833	0.61453		0.6978	1.96949	0.68833	0.83182
0.97321	0.20544	1.06157	1.47872		0.97321	0.17622	1.06157	1.29784
0.82504	0.46461	0.99367	0.80344		0.82504	0.47008	0.99367	0.75334
0.93906	0.82037	0.52645	0.69441		0.93906	0.72925	0.52645	1.22897
0.66397	0.69589	0.70546	1.03022		0.66397	0.8749	0.70546	1.36064
1.24328	0.99271	0.741	0.8244		1.24328	0.66653	0.741	1.03658
1.04425	1.22479	0.60063	1.18639		1.04425	0.97908	0.60063	1.84038
0.42514	0.54628	1.02668	1.40584		0.42514	1.0726	1.02668	1.2758
0.45317	0.48857	0.71781	0.77122		0.45317	0.89997	0.71781	1.00105
0.90931	0.78151	1.00378	0.27346		0.90931	0.71744	1.00378	0.25383
0.60921	0.78742				0.60921	1.07895
1.23349	0.74514				1.23349	0.50427
0.58451	0.7879				0.58451	1.12523
0.96109	0.88339				0.96109	0.76728
0.26176	0.31811				0.26176	1.01446
0.93559	0.82119				0.93559	0.73269
0.2582	0.06417				0.2582	0.20745
